# Supplementary material for: Translation in amino-acid-poor environments is limited by tRNAGln charging
Source: eLife. 2020 Dec 8;9:e62307. doi: 10.7554/eLife.62307 (PMC7744096; doi:10.7554/eLife.62307)
Supplement: Figure 1—source data 1. [file elife-62307-fig1-data1.xlsx]

## Sheet: Figure 1B
Summary Data for Figure 1B. O-propargyl-puromycin (OPP) incorporation assay. Relative incorporation of OPP from three independent experiments. Statistical test: one-way ANOVA with Holm-Sidak post-test (GraphPad Prizm 7.03)
	-AA
	0 hrs	1 hr	3 hrs	6 hrs
Rep. 1	1	0.4135	0.3387	0.2659
Rep. 2	1	0.3306	0.2293	0.1896
Rep. 3	1	0.3212	0.249	0.2163
Mean	1	0.3551	0.272333	0.223933
SD	0	0.0507938	0.0583131	0.0387185
P value	2.0992e-07
		0.00100129

## Sheet: Figure 1C
Summary Data for Figure 1C. tRNA charging assay. Experimental values (charged/total) from 4-5 independent experiments. Statistical test: paired Student's t test (GraphPad Prizm 7.03)
	1-hr amino acid deprivation						6-hr amino acid deprivation
	ValMAC		GlnCTG		iMetCAT		ValMAC		GlnCTG		iMetCAT
	+AA	-AA	+AA	-AA	+AA	-AA	+AA	-AA	+AA	-AA	+AA	-AA
Rep. 1	0.95	0.97	0.9	0.78	0.96	0.91	0.76	1	0.87	0.13	0.98	1
Rep. 2	1	0.96	0.85	0.83	1	0.99	0.89	0.87	0.8	0.08	0.84	0.72
Rep. 3	0.81	0.73	0.95	0.68	1	0.75	0.71	0.84	0.77	0.02	1	0.96
Rep. 4	0.83	1	0.83	0.44			1	0.9	0.79	0.07	1	0.77
Rep. 5	0.89	0.93	0.81	0.48	1	0.82
Mean	0.896	0.918	0.868	0.642	0.99	0.8675	0.84	0.9025	0.8075	0.075	0.955	0.8625
SD	0.0798749	0.108028	0.056745	0.175271	0.02	0.104682	0.130894	0.0694622	0.0434933	0.0450925	0.0772442	0.138173
P value	0.6336		0.0297		0.116		0.471		2.36629e-06		0.1856

## Sheet: Figure 1D
Summary Data for Figure 1D. tRNA charging assay. Experimental values (charged/total) from 3 independent experiments. Statistical test: one-way ANOVA with Holm-Sidak post-test (GraphPad Prizm 7.03)
	6-hr amino acid deprivation
	ValMAC			GlnCTG			iMetCAT
	+AA/DMSO	-AA/DMSO	-AA/BafA	+AA/DMSO	-AA/DMSO	-AA/BafA	+AA/DMSO	-AA/DMSO	-AA/BafA
Rep. 1	0.71	0.71	0.34	0.84	0.03	0.07	0.91	0.78	0.23
Rep. 2	0.89	0.87	0.51	0.8	0.08	0.13	0.84	0.72	0.39
Rep. 3	1	0.9	0.43	0.97	0.07	0.03	1	0.64	0.33
Mean	0.866667	0.826667	0.426667	0.87	0.06	0.0766667	0.916667	0.713333	0.316667
SD	0.146401	0.102144	0.085049	0.0888819	0.0264575	0.0503322	0.0802081	0.0702377	0.080829
P value		0.001			0.784257			0.00667135

## Sheet: Figure 1E
Summary Data for Figure 1E. tRNA charging assay. Experimental values (charged/total) from two independent experiments.
	6-hr amino acid deprivation
	ValMAC		GlnCTG
	control	CHX	control	CHX
Rep. 1	0.99	0.89	0.01	0.75
Rep. 2	1	0.99	0.02	0.98
Mean	0.995	0.94	0.015	0.865
SD	0.00707107	0.0707107	0.00707107	0.162635

## Sheet: Figure 1F
Summary Data for Figure 1F. tRNA charging assay. Experimental values (charged/total) from 2 independent experiments.
	6-hr amino acid deprivation
	ValMAC		GlnCTG
	control	L-Valinol	control	L-Valinol
Rep. 1	1	0.02	0.03	0.72
Rep. 2	1	0.05	0.03	0.53
Mean	1	0.035	0.03	0.625
SD	0	0.0212132	0	0.13435

## Sheet: Figure 1H
Summary Data for Figure 1H. tRNA charging assay. Experimental values (charged/total) from 3 independent experiments. Statistical test: paired Student's t test (GraphPad Prizm 7.03)
	24-hr amino acid deprivation
	ValMAC		GlnCTG		iMetCAT
	100% AA	5% AA	100% AA	5% AA	100% AA	5% AA
Rep. 1	0.79	0.95	0.71	0.02	0.81	0.78
Rep. 2	0.86	0.84	0.81	0.06	0.86	0.72
Rep. 3	0.82	0.84	0.81	0.04	0.88	0.69
Mean	0.823333	0.876667	0.776667	0.04	0.85	0.73
SD	0.0351188	0.0635085	0.057735	0.02	0.0360555	0.0458258
P value	0.431465		0.0011		0.126358

## Sheet: Figure 1 - figure supplement 1A
Summary Data for Figure 1 - figure supplement 1A. O-propargyl-puromycin (OPP) incorporation assay. Relative incorporation of OPP from three independent experiments. Statistical test: one-way ANOVA with Holm-Sidak post-test (GraphPad Prizm 7.03)
	-AA
	0 hrs	1 hr/DMSO	1 hr/ISRIB	6 hr/DMSO	6 hr/ISRIB
Rep. 1	1	0.3756	0.5458	0.2812	0.3303
Rep. 2	1	0.4655	0.5611	0.2688	0.3544
Rep. 3	1	0.489	0.5227	0.2321	0.2946
Mean	1	0.443367	0.5432	0.2607	0.326433
SD	0	0.0598523	0.0193316	0.0255325	0.0300869
P value		0.0141425		0.0457433

## Sheet: Figure 1 - figure supplement 1D
Summary Data for Figure 1 - figure supplement 1D. tRNA charging assay. Experimental values (charged/total) from 3-4 independent experiments. Statistical test: paired Student's t test (GraphPad Prizm 7.03)
	1-hr amino acid deprivation				6-hr amino acid deprivation
	ArgACG		LeuWAG		ArgACG		LeuWAG
	+AA	-AA	+AA	-AA	+AA	-AA	+AA	-AA
Rep. 1	1	0.79	1	0.67	0.89	0.73	0.87	0.76
Rep. 2	0.89	0.73	0.87	0.76	0.91	0.72	0.88	1
Rep. 3	1	0.96	0.95	0.89	0.9	0.98	1	0.77
Rep. 4			0.99	1			0.68	0.79
Mean	0.963333	0.826667	0.9525	0.83	0.9	0.81	0.8575	0.83
SD	0.0635085	0.119304	0.0590903	0.144914	0.01	0.147309	0.132256	0.114018
P value	0.113501		0.193784		0.402649		0.769776

## Sheet: Figure 1 - figure supplement 1E
Summary Data for Figure 1 - figure supplement 1E. Mass Spectrometry (dMRM) measurements of intracellular amino acids. Relative values (normalized to cell number) from 4 independent experiments. Statistical test: one-way ANOVA with Holm-Sidak post-test (GraphPad Prizm 7.03)
	0 hrs -AA				1 hrs -AA				6 hrs -AA
	Rep. 1	Rep. 2	Rep. 3	Rep. 4	Rep. 1	Rep. 2	Rep. 3	Rep. 4	Rep. 1	Rep. 2	Rep. 3	Rep. 4
L-Asparagine	1.185	0.892	1.022	0.9	1.508	0.937	0.892	1.095	1.083	1.485	0.893	1.051
L-Glutamic acid	0.992	0.829	1.237	0.942	1.149	0.86	1.283	0.914	1.129	0.785	1.262	0.95
L-Aspartic Acid	1.046	0.816	1.132	1.006	0.939	0.666	1.045	0.878	0.463	0.346	0.442	0.499
L-Proline	1.051	1.107	0.782	1.061	0.919	0.955	0.521	0.959	0.688	0.712	0.449	0.57
L-Tryptophan	1.078	1.015	0.9	1.007	0.408	0.46	0.295	0.387	0.343	0.429	0.255	0.344
L-Serine	1.197	0.748	0.962	1.093	0.391	0.279	0.284	0.286	0.244	0.384	0.213	0.393
L-Histidine	1.114	0.868	0.649	1.369	0.287	0.457	0.033	0.361	0.387	0.279	0.559	0.279
L-Tyrosine	0.849	1.189	1.176	0.786	0.223	0.269	0.225	0.2	0.283	0.274	0.243	0.22
L-Phenylalanine	0.949	1.011	1.238	0.801	0.234	0.227	0.212	0.168	0.682	0.599	0.748	0.511
L-Leucine	0.94	1.079	1.096	0.886	0.168	0.213	0.17	0.174	0.166	0.129	0.113	0.08
L-Threonine	1.145	0.935	0.827	1.093	0.144	0.169	0.101	0.182	0.112	0.161	0.075	0.117
L-Isoleucine	0.916	1.079	1.175	0.83	0.112	0.111	0.102	0.104	0.062	0.062	0.046	0.054
L-Methionine	0.973	1.095	1.056	0.876	0.084	0.101	0.066	0.066	0.142	0.141	0.079	0.114
L-Arginine	1.106	1.046	1.143	0.705	0.079	0.06	0.013	0.023	0.029	0.116	0.1	0.027
L-Glutamine	1.164	0.842	0.923	1.071	0.009	0.009	0.006	0.013	0.004	0.006	0.003	0.004
	Mean, 0 hrs -AA	Mean, 1 hrs -AA	Mean, 6 hrs -AA	SD, 0 hrs -AA	SD, 1 hrs -AA	SD, 6 hrs -AA	P value, 1 hr -AA	P value, 6 hrs -AA
L-Asparagine	0.99975	1.108	1.128	0.13708	0.280515	0.252077	0.703669	0.703669
L-Glutamic acid	1	1.0515	1.0315	0.172083	0.198894	0.208199	0.327678	0.389262
L-Aspartic Acid	1	0.882	0.4375	0.133457	0.159677	0.0653835	0.042848	3.67588e-05
L-Proline	1.00025	0.8385	0.60475	0.147529	0.21243	0.120967	0.0135278	0.000299739
L-Tryptophan	1	0.3875	0.34275	0.0738422	0.0688791	0.0710417	2.2867e-07	2.2867e-07
L-Serine	1	0.31	0.3085	0.193568	0.0540802	0.0933113	0.000571872	0.000571872
L-Histidine	1	0.2845	0.376	0.310796	0.181537	0.132197	0.0103906	0.0103906
L-Tyrosine	1	0.22925	0.255	0.212363	0.0288256	0.0289482	0.000160533	0.000160533
L-Phenylalanine	0.99975	0.21025	0.635	0.181629	0.029624	0.102713	3.06747e-05	0.00113207
L-Leucine	1.00025	0.18125	0.122	0.103365	0.0213131	0.0357305	1.64118e-06	1.64118e-06
L-Threonine	1	0.149	0.11625	0.145863	0.0356745	0.0352266	7.77769e-06	7.77769e-06
L-Isoleucine	1	0.10725	0.056	0.155801	0.00499166	0.00765942	1.27684e-05	1.27684e-05
L-Methionine	1	0.07925	0.119	0.097067	0.0168003	0.0296536	7.9994e-07	7.9994e-07
L-Arginine	1	0.04375	0.068	0.200687	0.0309987	0.0466548	3.6356e-05	3.6356e-05
L-Glutamine	1	0.00925	0.00425	0.144718	0.00287228	0.00125831	5.51054e-06	5.51054e-06

## Sheet: Figure 1 - figure supplement 1G
Summary Data for Figure 1 - figure supplement 1G. tRNA charging assay. Experimental values (charged/total) from 3 independent experiments. Statistical test: one-way ANOVA with Holm-Sidak post-test (GraphPad Prizm 7.03)
	6-hr amino acid deprivation
	GlnCTG				iMetCAT
	Prolif/+AA	Prolif/-AA	Quiesc/+AA	Quiesc/-AA	Prolif/+AA	Prolif/-AA	Quiesc/+AA	Quiesc/-AA
Rep. 1	0.86	0.01	0.68	0.15	0.88	0.97	0.75	0.57
Rep. 2	0.93	0.02	0.76	0.15	1	0.63	0.85	0.74
Rep. 3	0.88	0.02	0.9	0.18	0.99	0.82	1	0.67
Mean	0.89	0.0166667	0.78	0.16	0.956667	0.806667	0.866667	0.66
SD	0.0360555	0.0057735	0.111355	0.0173205	0.0665833	0.170392	0.125831	0.08544
P value	2.41403e-06		9.0573e-06		0.203298		0.184139
