# Supplementary material for: Translation in amino-acid-poor environments is limited by tRNAGln charging
Source: eLife. 2020 Dec 8;9:e62307. doi: 10.7554/eLife.62307 (PMC7744096; doi:10.7554/eLife.62307)
Supplement: Figure 2—source data 1. [file elife-62307-fig2-data1.xlsx]

## Sheet: Figure 2C
Summary Data for Figure 2C. CHARGE-seq assay. Experimental values (uncharged/total) from two independent experiments.
	Experiment 1				Experiment 2
	+AA/DMSO	+AA/CB-839	-AA/DMSO	-AA/CB-839	+AA/DMSO	+AA/CB-839	-AA/DMSO	-AA/CB-839
Ala-AGC	0	0.1	0.15	0.41	0.08	0	0.26	0.41
Ala-CGC	0	0.09	0.17	0.51	0.01	0	0.28	0.32
Ala-TGC	0	0.07	0.19	0.47	0.1	0	0.3	0.38
Arg-ACG	0.17	0	0.07	0.46	0.02	0.06	0.02	0
Arg-CCG	0	0.13	0.16	0.36	0.02	0.13	0.12	0
Arg-CCT	0.24	0.01	0	0.17	0.15	0.01	0	0.1
Arg-TCG	0.1	0	0.05	0.31	0.03	0.15	0	0.05
Arg-TCT	0.38	0	0.3	0.16	0	0.02	0.05	0.03
Asn-GTT	0.34	0.26	0.09	0	0.25	0.31	0	0.26
Asp-GTC	0.24	0.13	0.13	0	0.19	0	0.11	0.03
Cys-GCA	0.37	0	0.08	0.21	0.07	0	0.42	0.48
Gln-CTG	0	0.08	0.95	0.55	0.23	0	0.97	0.45
Gln-TTG	0	0.13	0.93	0.23	0.11	0	0.94	0.51
Glu-CTC	0	0.07	0.17	0.34	0.16	0	0.33	0.29
Glu-TTC	0	0.01	0.05	0.32	0.13	0	0.3	0.41
Gly-CCC	0.03	0	0.08	0.14	0.06	0.04	0	0.18
Gly-GCC	0.16	0.2	0	0.16	0.01	0	0.08	0.03
Gly-TCC	0	0	0.14	0.27	0.02	0	0.22	0.39
His-GTG	0.19	0.03	0.11	0	0.09	0	0.35	0.35
Ile-AAT	0	0.06	0.21	0.36	0.1	0	0.31	0.33
Ile-TAT	0.34	0	0.22	0.44	0.07	0	0.19	0.27
Leu-AAG	0	0.1	0.27	0.4	0.22	0	0.52	0.5
Leu-CAA	0.09	0.24	0	0.47	0	0.07	0.13	0.17
Leu-CAG	0	0.23	0.26	0.36	0.01	0	0.38	0.3
Leu-TAA	0.28	0	0.29	0.44	0	0.05	0.1	0.4
Leu-TAG	0	0.18	0.25	0.45	0.1	0	0.48	0.5
Lys-CTT	0.04	0.27	0.19	0	0.07	0.05	0.14	0
Lys-TTT	0	0.09	0.16	0.05	0.08	0	0.04	0.15
iMet-CAT	0.26	0	0.13	0.54	0.39	0	0.36	0.77
eMet-CAT	0	0.06	0.19	0.67	0	0.16	0.23	0.96
Phe-GAA	0.46	0	0.09	0.29	0.09	0	0.2	0.36
Pro-AGG	0	0.07	0.27	0.37	0	0.14	0.27	0.03
Pro-CGG	0.12	0	0.19	0.41	0.26	0	0.47	0.48
Pro-TGG	0.05	0	0.22	0.38	0.25	0	0.44	0.49
SeC-TCA	0.29	0.46	0.32	0	0.01	0	0.38	0.06
Ser-AGA	0.17	0.15	0	0.01	0.17	0	0.27	0.28
Ser-CGA	0.33	0	0.1	0.12	0	0.28	0.09	0.37
Ser-GCT	0.13	0.02	0	0.23	0	0.14	0.06	0.15
Ser-TGA	0.34	0	0.37	0.37	0	0.31	0.32	0.43
Thr-AGT	0.2	0	0.08	0.51	0.05	0	0.18	0.43
Thr-CGT	0.27	0	0.23	0.24	0	0.09	0.18	0.26
Thr-TGT	0.17	0.06	0	0.4	0	0.13	0.37	0.55
Trp-CCA	0	0.12	0.32	0.52	0	0.11	0.3	0.36
Tyr-GTA	0.05	0	0.22	0.51	0	0.03	0.33	0.54
Val-AAC	0.22	0	0.26	0.41	0.14	0	0.24	0.45
Val-CAC	0	0.04	0.18	0.36	0.15	0	0.4	0.4
Val-TAC	0.2	0	0.2	0.37	0.23	0	0.33	0.38

## Sheet: Figure 2D
Summary Data for Figure 2D. tRNA charging assay. Experimental values (charged/total) from 3-4 independent experiments. Statistical test: one-way ANOVA with Holm-Sidak post-test (GraphPad Prizm 7.03)
	6-hr amino acid deprivation
	GlnCTG				LeuWAG				iMetCAT				eMetCAT
	+AA/DMSO	+AA/CB-839	-AA/DMSO	-AA/CB-839	+AA/DMSO	+AA/CB-839	-AA/DMSO	-AA/CB-839	+AA/DMSO	+AA/CB-839	-AA/DMSO	-AA/CB-839	+AA/DMSO	+AA/CB-839	-AA/DMSO	-AA/CB-839
Rep. 1	0.87	0.78	0.03	0.84	0.85	0.83	0.8	0.84	1	0.83	0.71	0.3	1	0.87	0.81	0.06
Rep. 2	0.75	0.85	0.02	0.68	1	0.97	0.77	0.87	0.92	0.96	0.84	0.62	1	0.84	0.78	0.33
Rep. 3	0.9	0.79	0.03	0.64	0.94	0.84	0.78	0.65	0.93	0.83	0.85	0.26	1	0.86	0.83	0.03
Rep. 4	0.87	0.85	0.13	0.8					0.98	0.89	1	0.47
Mean	0.8475	0.8175	0.0525	0.74	0.93	0.88	0.783333	0.786667	0.9575	0.8775	0.85	0.4125	1	0.856667	0.806667	0.14
SD	0.0665207	0.0377492	0.0518813	0.095219	0.0754983	0.0781025	0.0152753	0.119304	0.0386221	0.0618466	0.118603	0.165605	0	0.0152753	0.0251661	0.165227
P value			7.11e-08				0.956679				0.000111246				9.84099e-05

## Sheet: Figure 2 - figure supplement 1A
Summary Data for Figure 2 - figure supplement 1A. tRNA charging assay. Experimental values (charged/total) from two independent experiments.
	6-hr amino acid deprivation
	GlnCTG				iMetCAT				eMetCAT				ArgACG				LeuWAG
	+AA/DMSO	+AA/CB-839	-AA/DMSO	-AA/CB-839	+AA/DMSO	+AA/CB-839	-AA/DMSO	-AA/CB-839	+AA/DMSO	+AA/CB-839	-AA/DMSO	-AA/CB-839	+AA/DMSO	+AA/CB-839	-AA/DMSO	-AA/CB-839	+AA/DMSO	+AA/CB-839	-AA/DMSO	-AA/CB-839
Rep. 1	0.87	0.87	0.03	0.78	0.87	0.72	0.83	0.66	1	0.86	0.81	0.71	0.79	0.89	0.93	1	0.93	1	0.77	0.73
Rep. 2	0.83	0.85	0.02	0.73	1	0.89	0.69	0.75	1	0.88	0.82	0.84	0.75	0.93	0.93	1	0.9	0.89	0.73	0.79
Mean	0.85	0.86	0.025	0.755	0.935	0.805	0.76	0.705	1	0.87	0.815	0.775	0.77	0.91	0.93	1	0.915	0.945	0.75	0.76
SD	0.0282843	0.0141421	0.00707107	0.0353553	0.0919239	0.120208	0.0989949	0.0636396	0	0.0141421	0.00707107	0.0919239	0.0282843	0.0282843	0	0	0.0212132	0.0777817	0.0282843	0.0424264

## Sheet: Figure 2 - figure supplement 1B
Summary Data for Figure 2 - figure supplement 1B. tRNA charging assay. Experimental values (charged/total) from two independent experiments.
	6-hr amino acid deprivation
	GlnCTG				iMetCAT				eMetCAT				ArgACG				LeuWAG
	+AA/DMSO	+AA/CB-839	-AA/DMSO	-AA/CB-839	+AA/DMSO	+AA/CB-839	-AA/DMSO	-AA/CB-839	+AA/DMSO	+AA/CB-839	-AA/DMSO	-AA/CB-839	+AA/DMSO	+AA/CB-839	-AA/DMSO	-AA/CB-839	+AA/DMSO	+AA/CB-839	-AA/DMSO	-AA/CB-839
Rep. 1	0.8	0.69	0.23	0.77	0.93	0.89	0.72	0.61	0.97	0.87	0.98	1	0.9	0.89	0.97	0.39	0.9	0.78	0.91	0.88
Rep. 2	0.67	0.78	0.25	0.75	0.92	0.92	0.83	0.9	1	0.94	0.87	0.99	1	0.97	1	0.33	1	0.9	0.96	0.9
Mean	0.735	0.735	0.24	0.76	0.925	0.905	0.775	0.755	0.985	0.905	0.925	0.995	0.95	0.93	0.985	0.36	0.95	0.84	0.935	0.89
SD	0.0919239	0.0636396	0.0141421	0.0141421	0.00707107	0.0212132	0.0777817	0.205061	0.0212132	0.0494975	0.0777817	0.00707107	0.0707107	0.0565685	0.0212132	0.0424264	0.0707107	0.0848528	0.0353553	0.0141421

## Sheet: Figure 2 - figure supplement 1G
Summary Data for Figure 2 - figure supplement 1G. Cell proliferation assay. Relative increase in cell number (Day 4/Day 1) from 3 independent experiments. Statistical test: one-way ANOVA with Holm-Sidak post-test (GraphPad Prizm 7.03)
	100% AA/DMSO	100% AA/CB-839	5% AA/DMSO	5% AA/CB-839
Rep. 1	18.0369	3.04738	1.709	2.26352
Rep. 2	14.1113	9.00943	1.56544	1.94898
Rep. 3	15.2211	9.39814	1.30534	2.03929
Mean	15.7897	7.15165	1.52659	2.08393
SD	2.02362	3.55971	0.204613	0.161951
P value			0.779543

## Sheet: Figure 2 - figure supplement 1H
Summary Data for Figure 2 - figure supplement 1H. Cell proliferation assay. Relative increase in cell number (Day 4/Day 1) from 4 independent experiments. Statistical test: one-way ANOVA with Holm-Sidak post-test (GraphPad Prizm 7.03)
	100% AA/DMSO	100% AA/CB-839	5% AA/DMSO	5% AA/CB-839
Rep. 1	4.58549	1.47578	1.04874	1.77487
Rep. 2	5.91848	1.38929	1.03201	2.95292
Rep. 3	3.52156	1.09544	1.10591	2.70471
Rep. 4	7.68507	1.27831	1.38844	3.05545
Mean	5.42765	1.30971	1.14378	2.62199
SD	1.79623	0.164126	0.166152	0.583626
P value			0.0403617

## Sheet: Figure 2 - figure supplement 1I
Summary Data for Figure 2 - figure supplement 1I. Cell proliferation assay. Relative increase in cell number (Day 4/Day 1) from 3 independent experiments. Statistical test: one-way ANOVA with Holm-Sidak post-test (GraphPad Prizm 7.03)
	100% AA/DMSO	100% AA/CB-839	5% AA/DMSO	5% AA/CB-839
Rep. 1	12.2031	7.05916	2.29625	2.69139
Rep. 2	11.9668	4.79511	1.47148	2.30926
Rep. 3	9.61686	5.25625	1.46646	1.76396
Mean	11.2623	5.70351	1.74473	2.25487
SD	1.42984	1.19646	0.477636	0.466104
P value			0.414812
