# Supplementary material for: Translation in amino-acid-poor environments is limited by tRNAGln charging
Source: eLife. 2020 Dec 8;9:e62307. doi: 10.7554/eLife.62307 (PMC7744096; doi:10.7554/eLife.62307)
Supplement: Figure 3—source data 1. [file elife-62307-fig3-data1.xlsx]

## Sheet: Figure 3A
Summary Data for Figure 3A. O-propargyl-puromycin (OPP) incorporation assay. Relative incorporation of OPP from three independent experiments. Statistical test: one-way ANOVA with Holm-Sidak post-test (GraphPad Prizm 7.03)
	+AA		-AA
	DMSO	CB-839	DMSO	CB-839
Rep. 1	1	1.1867	0.3468	0.766
Rep. 2	1	0.9969	0.3142	0.6276
Rep. 3	1	1.1347	0.2917	0.6377
Mean	1	1.1061	0.317567	0.6771
SD	0	0.0980789	0.0277039	0.0771551
P value			0.000140173

## Sheet: Figure 3B
Summary Data for Figure 3B. O-propargyl-puromycin (OPP) incorporation assay. Relative incorporation of OPP from three independent experiments. Statistical test: one-way ANOVA with Holm-Sidak post-test (GraphPad Prizm 7.03)
	+AA	-AA
	DMSO	DMSO	BPTES	c968
Rep. 1	1	0.2044	0.5514	0.3215
Rep. 2	1	0.2277	0.4401	0.3288
Rep. 3	1	0.2409	0.6353	0.4307
Mean	1	0.224333	0.542267	0.360333
SD	0	0.0184814	0.09792	0.0610485
P value		0.000418055
		0.0143992

## Sheet: Figure 3C
Summary Data for Figure 3C. O-propargyl-puromycin (OPP) incorporation assay. Relative incorporation of OPP from three independent experiments. Statistical test: one-way ANOVA with Holm-Sidak post-test (GraphPad Prizm 7.03)
	+AA	-AA
	control	control	5% Gln	5% Met
Rep. 1	1	0.2245	0.4746	0.2241
Rep. 2	1	0.2316	0.5109	0.2478
Rep. 3	1	0.2001	0.4233	0.1998
Mean	1	0.218733	0.4696	0.2239
SD	0	0.0165228	0.0440135	0.0240006
P value		5.93752e-06
		0.742993

## Sheet: Figure 3D
Summary Data for Figure 3D. GFP reporter accumulation assay. Relative fluorescence values from four independent experiments. Statistical test: one-way ANOVA with Holm-Sidak post-test (GraphPad Prizm 7.03)
	+AA	-AA				AA
	DMSO	DMSO	CB839	5% Gln	ISRIB	CHX	CHX + CB-839
Rep. 1	1	0.375238	0.418974	0.529817	0.300952	0.272527	0.278828
Rep. 2	1	0.285153	0.471402	0.430751	0.213297	0.091197	0.103437
Rep. 3	1	0.371162	0.438898	0.488969	0.325818	0.374797	0.359064
Rep. 4	1	0.439312	0.566887	0.549677	0.374084	0.354067	0.347103
Mean	1	0.367716	0.47404	0.499803	0.303538	0.273147	0.272108
SD	0	0.0632748	0.065561	0.0525161	0.0673876	0.129083	0.117871
P value		0.0294121
		0.0107105
						0.979281

## Sheet: Figure 3F
Summary Data for Figure 3F. IgG secretion assay. Relative IgG content in culture supernatants from four independent experiments. Statistical test: one-way ANOVA with Holm-Sidak post-test (GraphPad Prizm 7.03)
	100% AA			5% AA
	DMSO	CB-839	CHX	DMSO	CB-839
Rep. 1	1.0246	0.9429	0.1991	0.7579	0.9838
Rep. 2	1.0286	1.0054	0.2172	0.7583	0.9794
Rep. 3	0.9565	0.9892	0.1782	0.6216	1.0744
Rep. 4	1.1176	0.951	0.2278	0.768	1.2181
Mean	1.03182	0.972125	0.205575	0.72645	1.06393
SD	0.0660651	0.0299953	0.0217593	0.0700558	0.11172
P value				5.03466e-06

## Sheet: Figure 3 - figure supplement 1A
Summary Data for Figure 3 - figure supplement 1A. O-propargyl-puromycin (OPP) incorporation assay. Relative incorporation of OPP from three independent experiments. Statistical test: one-way ANOVA with Holm-Sidak post-test (GraphPad Prizm 7.03)
	+AA	-AA
	DMSO	DMSO	CB-839	DMSO/Gln
Rep. 1	1	0.421994	0.649699	0.616494
Rep. 2	1	0.266781	0.617364	0.723512
Rep. 3	1	0.2467	0.6198	0.5845
Mean	1	0.311825	0.628954	0.641502
SD	0	0.095936	0.0180066	0.072802
P value		0.00115285
		0.00115285

## Sheet: Figure 3 - figure supplement 1B
Summary Data for Figure 3 - figure supplement 1B. O-propargyl-puromycin (OPP) incorporation assay. Relative incorporation of OPP from three independent experiments. Statistical test: one-way ANOVA with Holm-Sidak post-test (GraphPad Prizm 7.03)
	+AA	-AA
	DMSO	DMSO	CB-839	DMSO/Gln
Rep. 1	1	0.157751	0.294719	0.662363
Rep. 2	1	0.17971	0.438563	0.728666
Rep. 3	1	0.1997	0.4576	0.7215
Mean	1	0.179054	0.396961	0.704176
SD	0	0.0209822	0.089054	0.0363882
P value		0.0328053
		0.00120705

## Sheet: Figure 3 - figure supplement 1C
Summary Data for Figure 3 - figure supplement 1C. GFP reporter accumulation assay. Relative fluorescence values from three independent experiments. Statistical test: one-way ANOVA with Holm-Sidak post-test (GraphPad Prizm 7.03)
	GFP		d2GFP
	+AA	-AA	+AA	-AA
Rep.1	1	1.0393	1	0.3656
Rep.2	1	1.0035	1	0.4282
Rep.3	1	1.0027	1	0.3998
Mean	1	1.01517	1	0.397867
SD	1	1.01517	1	0.397867
P value	0.335755		0.000902059

## Sheet: Figure 3 - figure supplement 1D
Summary Data for Figure 3 - figure supplement 1D. GFP reporter accumulation assay. Relative fluorescence values from two independent experiments.
	GFP					d2GFP
		+AA		-AA			+AA		-AA
	untreated	3 hr CHX	6 hrs CHX	3 hr CHX	6 hrs CHX	untreated	3 hr CHX	6 hrs CHX	3 hr CHX	6 hrs CHX
Rep. 1	1	0.914	0.989	0.939	1.054	1	0.468	0.336	0.403	0.286
Rep. 2	1	0.914	0.989	0.939	1.054	1	0.538	0.295	0.449	0.221
Mean	1	0.914	0.989	0.939	1.054	1	0.503	0.3155	0.426	0.2535
SD	0	0	0	0	0	0	0.0494975	0.0289914	0.0325269	0.0459619
