# Supplementary material for: Translation in amino-acid-poor environments is limited by tRNAGln charging
Source: eLife. 2020 Dec 8;9:e62307. doi: 10.7554/eLife.62307 (PMC7744096; doi:10.7554/eLife.62307)
Supplement: Figure 4—source data 1. [file elife-62307-fig4-data1.xlsx]

## Sheet: Figure 4B
Summary Data for Figure 4B. 5-ethynyluridine (5-EU) incorporation assay. Relative incorporation of 5-EU from four independent experiments. Statistical test: one-way ANOVA with Holm-Sidak post-test (GraphPad Prizm 7.03)
	100% AA	5% AA
	DMSO	DMSO	CB-839	0.2 mM Gln
Rep.1	1	0.163678	0.644655	0.464109
Rep.2	1	0.101294	0.271424	0.243339
Rep.3	1	0.21005	0.440543	0.361267
Rep.4	1	0.275236	0.557703	0.432794
Mean	1	0.187564	0.478581	0.375377
SD	0	0.0734962	0.161454	0.097985
P value	3.123e-07
		0.000840237
		0.00672554

## Sheet: Figure 4F
Summary Data for Figure 4F. GFP reporter accumulation assay. Relative fluorescence values from 3 independent experiments. Statistical test: paired Student's t test (GraphPad Prizm 7.03)
	GFP		PolyQ-GFP
	+AA	-AA	+AA	-AA
Rep. 1	1	1.02373	1	0.431093
Rep. 2	1	1.2738	1	0.688494
Rep. 3	1	1.00788	1	0.574281
Mean	1	1.1018	1	0.564623
SD	0	0.149163	0	0.128972
P value	0.358661		0.0280269

## Sheet: Figure 4G
Summary Data for Figure 4F. GFP reporter accumulation assay. Relative fluorescence values from 3 independent experiments. Statistical test: one-way ANOVA with Holm-Sidak post-test (GraphPad Prizm 7.03)
	+AA			-AA
	DMSO	CB-839	200 μM Gln	DMSO	CB-839	200 μM Gln
Rep. 1	1	1.02853	0.995386	0.3893	0.680105	0.547808
Rep. 2	1	0.838893	0.950351	0.323721	0.522932	0.595591
Rep. 3	1	0.89682	1.01256	0.322967	0.595583	0.577041
Mean	1	0.921416	0.986099	0.345329	0.59954	0.57348
SD	0	0.0971835	0.0321271	0.0380816	0.0786612	0.0240897
P value				0.000146858
				0.000175511

## Sheet: Figure 4 - figure supplement 1E
Summary Data for Figure 4 - figure supplement 1E. 5-ethynyluridine (5-EU) incorporation assay. Relative incorporation of 5-EU from three independent replicates. Statistical test: one-way ANOVA with Holm-Sidak post-test (GraphPad Prizm 7.03)
	shCtrl-1	shCtrl-2	shGLS-1	shGLS-2
Rep.1	0.05275	0.08723	0.14987	0.13562
Rep.2	0.0502	0.05745	0.18199	0.12055
Rep.3	0.04084	0.05532	0.18262	0.10488
Mean	0.04793	0.0666667	0.171493	0.12035
SD	0.0062711	0.0178402	0.018729	0.015371
P value	3.80717e-05
		9.57639e-05
	0.000836801
		0.00269333

## Sheet: Figure 4 - figure supplement 1F
Summary Data for Figure 4 - figure supplement 1F. Mass Spectrometry (dMRM) measurements of intracellular ribonucleotide triphosphate levels. Relative values (normalized to cell number) from 4 independent experiments. Statistical test: one-way ANOVA with Holm-Sidak post-test (GraphPad Prizm 7.03)
	ATP			UTP			GTP			CTP
	100% AA/DMSO	5% AA/DMSO	5% AA/CB-839	100% AA/DMSO	5% AA/DMSO	5% AA/CB-839	100% AA/DMSO	5% AA/DMSO	5% AA/CB-839	100% AA/DMSO	5% AA/DMSO	5% AA/CB-839
Rep. 1	1	1.00459	0.7453	1	1.42281	1.10135	1	2.96496	1.10634	1	1.3329	1.00373
Rep. 2	1	0.981871	0.747692	1	0.903208	0.888747	1	2.02604	1.00288	1	0.939773	0.82797
Rep. 3	1	0.460918	0.451952	1	0.341537	0.46188	1	1.59598	1.06702	1	0.444888	0.555491
Rep. 4	1	0.755569	0.333836	1	0.662909	0.318304	1	1.65968	0.637818	1	0.897824	0.428202
Mean	1	0.800738	0.569695	1	0.832615	0.692571	1	2.06167	0.953514	1	0.903846	0.703848
SD	0	0.252906	0.209772	0	0.455802	0.364637	0	0.631313	0.21474	0	0.363343	0.260336
P value		0.1882			0.633315			0.0024494			0.319262

## Sheet: Figure 4 - Figure Supplement 1G
Summary Data for Figure 4 - figure supplement 1G. GFP reporter accumulation assay. Relative fluorescence values from two independent experiments.
		+AA		-AA
	untreated	3 hr CHX	6 hrs CHX	3 hr CHX	6 hrs CHX
Rep. 1	1	0.871	0.947	0.882	0.963
Rep. 2	1	0.936	0.84	0.968	0.831
Mean	1	0.9035	0.8935	0.925	0.897
SD	0	0.0459619	0.0756604	0.0608112	0.0933381
