# Supplementary material for: Translation in amino-acid-poor environments is limited by tRNAGln charging
Source: eLife. 2020 Dec 8;9:e62307. doi: 10.7554/eLife.62307 (PMC7744096; doi:10.7554/eLife.62307)
Supplement: Figure 5—source data 1. [file elife-62307-fig5-data1.xlsx]

## Sheet: Figure 5D
Summary Data for Figure 5D. GFP reporter accumulation assay. Relative fluorescence values from three independent experiments. Statistical test: one-way ANOVA with Holm-Sidak post-test (GraphPad Prizm 7.03)
	control	5% AA	5% Glucose	50 μM H2O2	0.5 μM Thapsigargin	100 mM NaCl
Rep. 1	1	7.3063	1.2556	1.2718	0.9625	1.1247
Rep. 2	1	3.1271	1.3003	0.9749	1.1187	0.9483
Rep. 3	1	11.1632	1.4761	1.2516	1.1847	1.2452
Mean	1	7.19887	1.344	1.1661	1.08863	1.10607
SD	0	4.01913	0.116565	0.165892	0.114111	0.149324
P value		0.00410841	0.998365	0.999058	0.999058	0.999058

## Sheet: Figure 5E
Summary Data for Figure 5E. GFP reporter accumulation assay. Relative fluorescence values from three independent experiments. Statistical test: one-way ANOVA with Holm-Sidak post-test (GraphPad Prizm 7.03)
	PolyQ-1-GFP				Luc-1-GFP
	100% AA	5% AA			100% AA	5% AA
	DMSO	DMSO	CB-839	0.2 mM Gln	DMSO	DMSO	CB-839	0.2 mM Gln
Rep. 1	1	4.0927	1.0947	1.427	0.9408	1.14	0.9941	1.0138
Rep. 2	1	8.6688	1.2722	1.6962	0.9156	1.2679	0.9241	1.0169
Rep. 3	1	4.3286	1.1137	1.7189	0.9812	1.1244	0.9597	0.9839
Mean	1	5.6967	1.1602	1.61403	0.945867	1.17743	0.9593	1.00487
SD	0	2.57662	0.097459	0.162373	0.0330922	0.0787337	0.0350017	0.0182237
P value	0.00385586				0.00177957

## Sheet: Figure 5 - figure supplement 1E
Summary Data for Figure 5 - figure supplement 1E. GFP reporter accumulation assay. Relative fluorescence values from three independent experiments. Statistical test: one-way ANOVA with Holm-Sidak post-test (GraphPad Prizm 7.03)
	PolyQ-1-GFP			Luc-1-GFP
	complete	400 μM Gln	60 μM Leu	complete	400 μM Gln	60 μM Leu
Rep. 1	1	6.247	2.049	0.955	1.431	1.362
Rep. 2	1	13.378	2.303	0.9	1.224	1.223
Rep. 3	1	11.005	2.118	0.927	1.464	1.338
Mean	1	10.21	2.15667	0.927333	1.373	1.30767
SD	0	3.63136	0.131341	0.0275015	0.130088	0.0742989
P value		0.00877655			0.222175
