# Supplementary material for: Translation in amino-acid-poor environments is limited by tRNAGln charging
Source: eLife. 2020 Dec 8;9:e62307. doi: 10.7554/eLife.62307 (PMC7744096; doi:10.7554/eLife.62307)
Supplement: Figure 6—source data 1. [file elife-62307-fig6-data1.xlsx]

## Sheet: Figure 6B
Summary Data for Figure 6B. GFP+ cell accumulation assay. Percentage of GFP+ cells within the total viable cell population. Experimental values from three separate animals plotted for each time point. Statistical test: two-way ANOVA with Holm-Sidak post-test (GraphPad Prizm 7.03)
	Week 3		Week 5
	vector	PolyQ-1-GFP	vector	PolyQ-1-GFP
Rep. 1	0	0.19	0	0.04
Rep. 2	0	0.46	0	0.06
Rep. 3	0	0.35	0	0.03
Mean	0	0.333333	0	0.0433333
SD	0	0.135769	0	0.0152753
P value				0.0016
